# Supplementary material for: Determination of Na+ Cation Locations in Nanozeolite ECR-1 Using a 3D ED Method
Source: MDPI journal article supplement (doi:10.3390/sym16040477), 2024-04-15

## checkCIF/PLATON report

You have not supplied any structure factors. As a result the full set of tests cannot be run.

THIS REPORT IS FOR GUIDANCE ONLY. IF USED AS PART OF A REVIEW PROCEDURE FOR PUBLICATION, IT SHOULD NOT REPLACE THE EXPERTISE OF AN EXPERIENCED CRYSTALLOGRAPHIC REFEREE.

No syntax errors found.      CIF dictionary      Interpreting this report

### Datablock: I

---

|                 |                                                      |                           |
|-----------------|------------------------------------------------------|---------------------------|
| Bond precision: | Si- O = 0.0123 A                                     | Wavelength=0.02508        |
| Cell:           | a=7.48650<br>alpha=90                                | b=17.84630<br>beta=90     |
| Temperature:    | 103 K                                                | c=25.65450<br>gamma=90    |
|                 | Calculated                                           | Reported                  |
| Volume          | 3427.603                                             | 3428                      |
| Space group     | P m m n                                              | P m m n                   |
| Hall group      | -P 2ab 2a                                            | -P -2xa;-2y               |
| Moiety formula  | Na1.80 O120 Si60,<br>0.636(O2), 3.54(O),<br>6.36(Na) | ?                         |
| Sum formula     | Na8.16 O124.81 Si60                                  | Na8.154744 O124.8117 Si60 |
| Mr              | 3869.90                                              | 3869.50                   |
| Dx,g cm-3       | 1.875                                                | 1.875                     |
| Z               | 1                                                    | 1                         |
| Mu (mm-1)       | 0.000                                                | 0.000                     |
| F000            | 0.0                                                  | 635.6                     |
| F000'           | 1927.93                                              |                           |
| h,k,lmax        |                                                      | 9,23,31                   |
| Nref            |                                                      | 17481                     |
| Tmin,Tmax       |                                                      |                           |
| Tmin'           |                                                      |                           |

Correction method= Not given

Data completeness=      Theta(max)= 1.010

R(reflections)= 0.0966( 1040)

wR2(reflections)=  
0.2245( 17481)

S = 0.798

Npar= 275

---

The following ALERTS were generated. Each ALERT has the format

**test-name\_ALERT\_alert-type\_alert-level.**

Click on the hyperlinks for more details of the test.

---

### Alert level A

GEOM006\_ALERT\_1\_A \_geom\_angle\_atom\_site\_label\_2 is missing  
Label identifying the atom site 2.

**Author Response: A table of bond angles are already given in the supplementary files.**

GEOM007\_ALERT\_1\_A \_geom\_angle\_atom\_site\_label\_3 is missing  
Label identifying the atom site 3.

GEOM008\_ALERT\_1\_A \_geom\_angle is missing  
Angle between atom sites 1, 2 and 3.

SHFSU01\_ALERT\_2\_A The absolute value of parameter shift to su ratio > 0.20  
Absolute value of the parameter shift to su ratio given 5.923  
Additional refinement cycles may be required.

PLAT080\_ALERT\_2\_A Maximum Shift/Error ..... 5.92 Why ?

|     |      |     |     |     |     |     |     |
|-----|------|-----|-----|-----|-----|-----|-----|
| Si1 | Si2  | Si3 | Si4 | Si5 | Si6 | Si7 | Si8 |
| Si9 | Si10 | O1  | O2  | O3  | O4  | O5  | O6  |
| O7  | O8   | O9  | O10 | O11 | O12 | O13 | O14 |
| O15 | O16  | O17 | O18 | O19 | O20 | O21 | O22 |
| O23 |      |     |     |     |     |     |     |

**Author Response: This is related to 3D ED data and dynamical refinements.**

---

### Alert level B

RINTA01\_ALERT\_3\_B The value of Rint is greater than 0.18  
Rint given 0.184

PLAT020\_ALERT\_3\_B The Value of Rint is Greater Than 0.12 ..... 0.184 Report

PLAT242\_ALERT\_2\_B Low 'MainMol' Ueq as Compared to Neighbors of Si4 Check

PLAT601\_ALERT\_2\_B Unit Cell Contains Solvent Accessible VOIDS of . 177 Ang\*\*3

---

### Alert level C

GOODF01\_ALERT\_2\_C The least squares goodness of fit parameter lies  
outside the range 0.80 <> 2.00  
Goodness of fit given = 0.798

PLAT041\_ALERT\_1\_C Calc. and Reported SumFormula Strings Differ Please Check  
Calc: Na8.16 O124.81 Si60  
Rep.: Na8.154744 O124.8117 Si60

PLAT077\_ALERT\_4\_C Unitcell Contains Non-integer Number of Atoms .. Please Check

PLAT127\_ALERT\_1\_C Implicit Hall Symbol Inconsistent with Explicit -P -2xa;-2 Check

PLAT141\_ALERT\_4\_C s.u. on a - Axis Small or Missing ..... 0.00000 Ang.

PLAT142\_ALERT\_4\_C s.u. on b - Axis Small or Missing ..... 0.00000 Ang.

PLAT143\_ALERT\_4\_C s.u. on c - Axis Small or Missing ..... 0.00000 Ang.

PLAT151\_ALERT\_1\_C No s.u. (esd) Given on Volume ..... Please Do !

PLAT202\_ALERT\_3\_C Isotropic non-H Atoms in Anion/Solvent ..... 4 Check  
Ow1 Ow2 Na1 Na2

PLAT241\_ALERT\_2\_C High 'MainMol' Ueq as Compared to Neighbors of 01 Check

|                   |      |           |                                 |      |       |
|-------------------|------|-----------|---------------------------------|------|-------|
| PLAT241_ALERT_2_C | High | 'MainMol' | Ueq as Compared to Neighbors of | O2   | Check |
| PLAT241_ALERT_2_C | High | 'MainMol' | Ueq as Compared to Neighbors of | O4   | Check |
| PLAT241_ALERT_2_C | High | 'MainMol' | Ueq as Compared to Neighbors of | O11  | Check |
| PLAT241_ALERT_2_C | High | 'MainMol' | Ueq as Compared to Neighbors of | O14  | Check |
| PLAT241_ALERT_2_C | High | 'MainMol' | Ueq as Compared to Neighbors of | O15  | Check |
| PLAT241_ALERT_2_C | High | 'MainMol' | Ueq as Compared to Neighbors of | O16  | Check |
| PLAT241_ALERT_2_C | High | 'MainMol' | Ueq as Compared to Neighbors of | O18  | Check |
| PLAT241_ALERT_2_C | High | 'MainMol' | Ueq as Compared to Neighbors of | O19  | Check |
| PLAT241_ALERT_2_C | High | 'MainMol' | Ueq as Compared to Neighbors of | O20  | Check |
| PLAT242_ALERT_2_C | Low  | 'MainMol' | Ueq as Compared to Neighbors of | Si1  | Check |
| PLAT242_ALERT_2_C | Low  | 'MainMol' | Ueq as Compared to Neighbors of | Si2  | Check |
| PLAT242_ALERT_2_C | Low  | 'MainMol' | Ueq as Compared to Neighbors of | Si3  | Check |
| PLAT242_ALERT_2_C | Low  | 'MainMol' | Ueq as Compared to Neighbors of | Si5  | Check |
| PLAT242_ALERT_2_C | Low  | 'MainMol' | Ueq as Compared to Neighbors of | Si6  | Check |
| PLAT242_ALERT_2_C | Low  | 'MainMol' | Ueq as Compared to Neighbors of | Si7  | Check |
| PLAT242_ALERT_2_C | Low  | 'MainMol' | Ueq as Compared to Neighbors of | Si8  | Check |
| PLAT242_ALERT_2_C | Low  | 'MainMol' | Ueq as Compared to Neighbors of | Si9  | Check |
| PLAT242_ALERT_2_C | Low  | 'MainMol' | Ueq as Compared to Neighbors of | Si10 | Check |

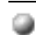

#### Alert level G

ABSMU01\_ALERT\_1\_G Calculation of \_exptl\_absorpt\_correction\_mu  
not performed for this radiation type.

|                   |                                                  |        |        |
|-------------------|--------------------------------------------------|--------|--------|
| PLAT004_ALERT_5_G | Polymeric Structure Found with Maximum Dimension | 3      | Info   |
| PLAT005_ALERT_5_G | No Embedded Refinement Details Found in the CIF  | Please | Do !   |
| PLAT301_ALERT_3_G | Main Residue Disorder ..... (Resd 1)             | 2%     | Note   |
| PLAT302_ALERT_4_G | Anion/Solvent/Minor-Residue Disorder (Resd 2)    | 100%   | Note   |
| PLAT302_ALERT_4_G | Anion/Solvent/Minor-Residue Disorder (Resd 3)    | 100%   | Note   |
| PLAT302_ALERT_4_G | Anion/Solvent/Minor-Residue Disorder (Resd 4)    | 100%   | Note   |
| PLAT302_ALERT_4_G | Anion/Solvent/Minor-Residue Disorder (Resd 5)    | 100%   | Note   |
| PLAT302_ALERT_4_G | Anion/Solvent/Minor-Residue Disorder (Resd 6)    | 100%   | Note   |
| PLAT302_ALERT_4_G | Anion/Solvent/Minor-Residue Disorder (Resd 7)    | 100%   | Note   |
| PLAT302_ALERT_4_G | Anion/Solvent/Minor-Residue Disorder (Resd 8)    | 100%   | Note   |
| PLAT302_ALERT_4_G | Anion/Solvent/Minor-Residue Disorder (Resd 9)    | 100%   | Note   |
| PLAT311_ALERT_2_G | Isolated Disordered Oxygen Atom (No H's ?) ..... | Ow1    | Check  |
| PLAT311_ALERT_2_G | Isolated Disordered Oxygen Atom (No H's ?) ..... | Ow2    | Check  |
| PLAT311_ALERT_2_G | Isolated Disordered Oxygen Atom (No H's ?) ..... | Ow4    | Check  |
| PLAT396_ALERT_2_G | Deviating Si-O-Si Angle From 150 for O2          | 137.7  | Degree |
| PLAT396_ALERT_2_G | Deviating Si-O-Si Angle From 150 for O4          | 177.0  | Degree |
| PLAT396_ALERT_2_G | Deviating Si-O-Si Angle From 150 for O10         | 139.3  | Degree |
| PLAT396_ALERT_2_G | Deviating Si-O-Si Angle From 150 for O14         | 132.3  | Degree |
| PLAT396_ALERT_2_G | Deviating Si-O-Si Angle From 150 for O15         | 139.0  | Degree |
| PLAT396_ALERT_2_G | Deviating Si-O-Si Angle From 150 for O17         | 138.4  | Degree |
| PLAT396_ALERT_2_G | Deviating Si-O-Si Angle From 150 for O18         | 160.4  | Degree |
| PLAT396_ALERT_2_G | Deviating Si-O-Si Angle From 150 for O23         | 180.0  | Degree |
| PLAT720_ALERT_4_G | Number of Unusual/Non-Standard Labels .....      | 4      | Note   |
|                   | Ow1 Ow2 Ow3 Ow4                                  |        |        |
| PLAT802_ALERT_4_G | CIF Input Record(s) with more than 80 Characters | 1      | Info   |
| PLAT860_ALERT_3_G | Number of Least-Squares Restraints .....         | 17     | Note   |
| PLAT883_ALERT_1_G | No Info/Value for _atom_sites_solution_primary   | Please | Do !   |
| PLAT966_ALERT_5_G | Note: Non-Standard (i.e. 2.0) OMIT Threshold of  | 3.0    | Sig(I) |

- 
- 5 **ALERT level A** = Most likely a serious problem - resolve or explain  
 4 **ALERT level B** = A potentially serious problem, consider carefully  
 28 **ALERT level C** = Check. Ensure it is not caused by an omission or oversight  
 28 **ALERT level G** = General information/check it is not something unexpected

8 ALERT type 1 CIF construction/syntax error, inconsistent or missing data  
35 ALERT type 2 Indicator that the structure model may be wrong or deficient  
5 ALERT type 3 Indicator that the structure quality may be low  
14 ALERT type 4 Improvement, methodology, query or suggestion  
3 ALERT type 5 Informative message, check

---

It is advisable to attempt to resolve as many as possible of the alerts in all categories. Often the minor alerts point to easily fixed oversights, errors and omissions in your CIF or refinement strategy, so attention to these fine details can be worthwhile. In order to resolve some of the more serious problems it may be necessary to carry out additional measurements or structure refinements. However, the purpose of your study may justify the reported deviations and the more serious of these should normally be commented upon in the discussion or experimental section of a paper or in the "special\_details" fields of the CIF. checkCIF was carefully designed to identify outliers and unusual parameters, but every test has its limitations and alerts that are not important in a particular case may appear. Conversely, the absence of alerts does not guarantee there are no aspects of the results needing attention. It is up to the individual to critically assess their own results and, if necessary, seek expert advice.

### **Publication of your CIF in IUCr journals**

A basic structural check has been run on your CIF. These basic checks will be run on all CIFs submitted for publication in IUCr journals (*Acta Crystallographica*, *Journal of Applied Crystallography*, *Journal of Synchrotron Radiation*); however, if you intend to submit to *Acta Crystallographica Section C* or *E* or *IUCrData*, you should make sure that full publication checks are run on the final version of your CIF prior to submission.

### **Publication of your CIF in other journals**

Please refer to the *Notes for Authors* of the relevant journal for any special instructions relating to CIF submission.

---

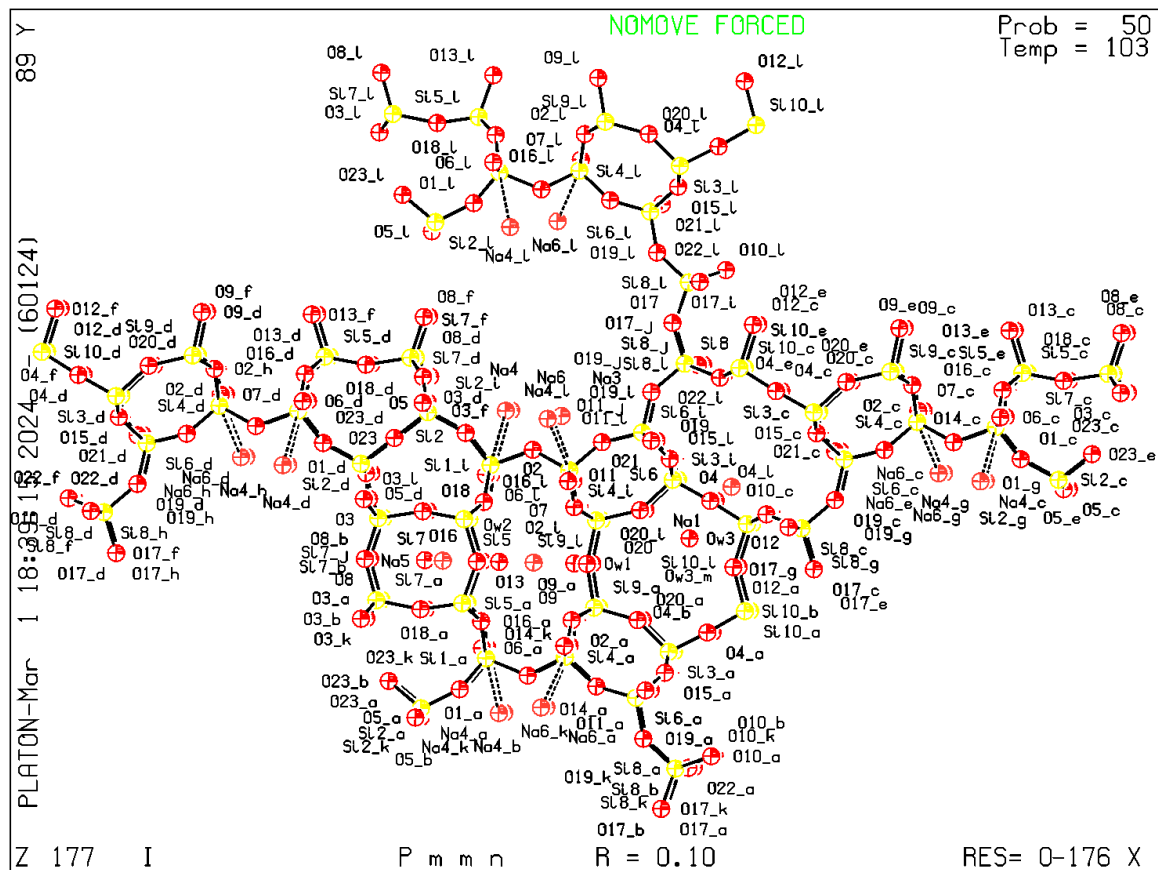

Supplement: s1 [file s1]
