# Supplementary material for: Determination of Na+ Cation Locations in Nanozeolite ECR-1 Using a 3D ED Method
Source: MDPI journal article supplement (doi:10.3390/sym16040477), 2024-04-15
Supplement: s1 [file s1]

# Determination of Na<sup>+</sup> Cation Locations in Nanozeolite ECR-1 Through 3D ED Method

Taylan Örs <sup>1,2</sup>, Irena Deroche <sup>1,2</sup>, Corentin Chatelard <sup>3,4</sup>, Mathias Dodin <sup>3</sup>, Raquel Martinez-Franco <sup>3</sup>, Alain Tuel <sup>4</sup> and Jean-Louis Paillaud <sup>1,2,\*</sup>

<sup>1</sup> Université de Haute-Alsace, Institut de Science des Matériaux de Mulhouse, UMR 7361, 15 rue Jean Starcky, 68100 Mulhouse, France

<sup>2</sup> Université de Strasbourg, 67000 Strasbourg, France

<sup>3</sup> IFP Energies Nouvelles-Etablissement de Lyon, Rond-point de l'échangeur de Solaize, BP 3, 69360, Solaize, France

<sup>4</sup> Université de Lyon, Institut de Recherches sur la Catalyse et l'Environnement de Lyon, IRCELYON, UMR CNRS 5256, Université Lyon 1, 2 av. Einstein, 69626, Villeurbanne Cedex, France

\* Correspondence: jean-louis.paillaud@uha.fr (J.-L.P.)

## Supplementary Materials

### Table of contents

|                                                                                                                                                       |   |
|-------------------------------------------------------------------------------------------------------------------------------------------------------|---|
| <b>Figure S1:</b> TEM image of the measured ECR-1 crystal. -----                                                                                      | 1 |
| <b>Figure S2:</b> Energy dispersive X-ray spectroscopy (EDX) analyses of ECR-1 zeolite.-----                                                          | 2 |
| <b>Figure S3:</b> Projections along [100] of the ECR-1 zeolite.-----                                                                                  | 4 |
| <b>Table S1:</b> Fractional atomic coordinates and isotropic displacement parameters (Å <sup>2</sup> ) of ECR-1(3D ED, kinematical refinement). ----- | 5 |
| <b>Table S2:</b> Fractional atomic coordinates and isotropic displacement parameters (Å <sup>2</sup> ) of ECR-1 (3D ED, dynamical refinement).-----   | 6 |
| <b>Table S3:</b> Si—O bond lengths and O—Si—O angles of ECR-1 (3D ED, dynamical refinement).-----                                                     | 7 |

**Figure S1:** TEM image of the measured ECR-1 crystal.

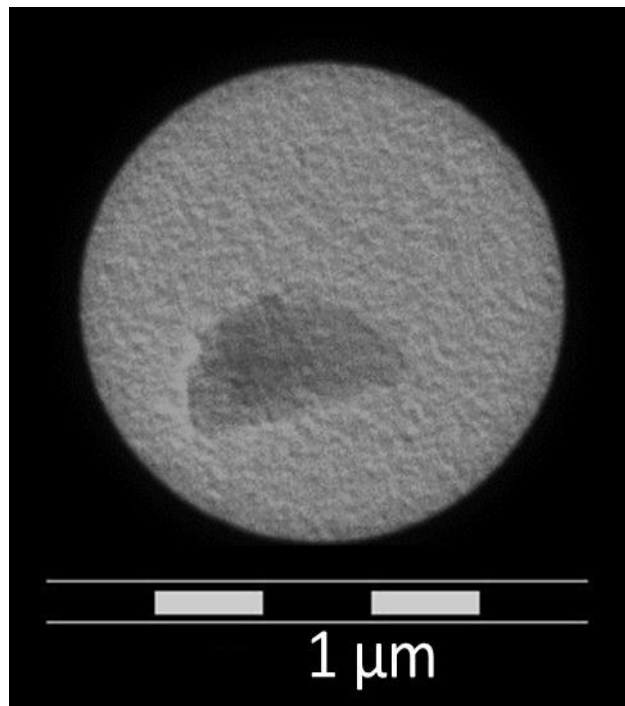

**Figure S2:** Energy dispersive X-ray spectroscopy (EDX) analyses of ECR-1 zeolite.

Analysis method: Phi-Rho-Z

Calibrated elements: Si, Al, Na, O on albite (Si/Al=3.03)

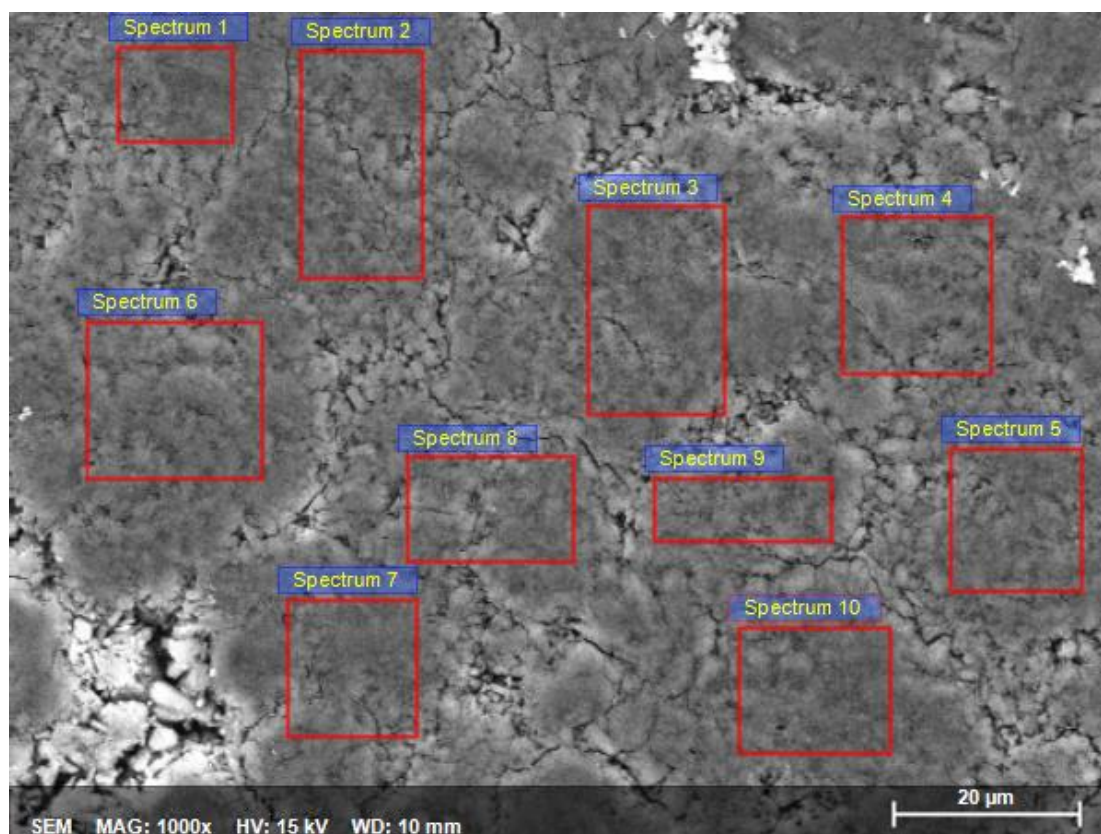

| Atomic composition (%) |       |      |      |       |  |             |       | Formula $\text{Na}_x\text{Al}_x\text{Si}_{60-x}\text{O}_{120}$ |
|------------------------|-------|------|------|-------|--|-------------|-------|----------------------------------------------------------------|
| Spectra                | O     | Na   | Al   | Si    |  | Si/Al       | Na/Al | x                                                              |
| Spectrum 1             | 65.82 | 5.1  | 4.87 | 24.21 |  | 4.97        | 1.05  | 10.05                                                          |
| Spectrum 2             | 65.23 | 5.15 | 5.11 | 24.5  |  | 4.79        | 1.01  | 10.35                                                          |
| Spectrum 3             | 65.23 | 5.1  | 5.09 | 24.58 |  | 4.83        | 1.00  | 10.29                                                          |
| Spectrum 4             | 64.98 | 5.19 | 5.2  | 24.64 |  | 4.74        | 1.00  | 10.46                                                          |
| Spectrum 5             | 65.01 | 5.21 | 5.18 | 24.6  |  | 4.75        | 1.01  | 10.44                                                          |
| Spectrum 6             | 65.75 | 5.12 | 5.13 | 24    |  | 4.68        | 1.00  | 10.57                                                          |
| Spectrum 7             | 65.35 | 5.14 | 5.19 | 24.32 |  | 4.69        | 0.99  | 10.55                                                          |
| Spectrum 8             | 65.31 | 5.08 | 5.13 | 24.48 |  | 4.77        | 0.99  | 10.40                                                          |
| Spectrum 9             | 65.1  | 5.14 | 5.2  | 24.56 |  | 4.72        | 0.99  | 10.48                                                          |
| Spectrum 10            | 65.13 | 5.39 | 5.12 | 24.35 |  | 4.76        | 1.05  | 10.42                                                          |
| Mean values            | 65.29 | 5.16 | 5.12 | 24.42 |  | Mean values |       |                                                                |
| Standard deviation     | 0.29  | 0.09 | 0.10 | 0.20  |  | 4.77        | 1.01  | 10.40                                                          |

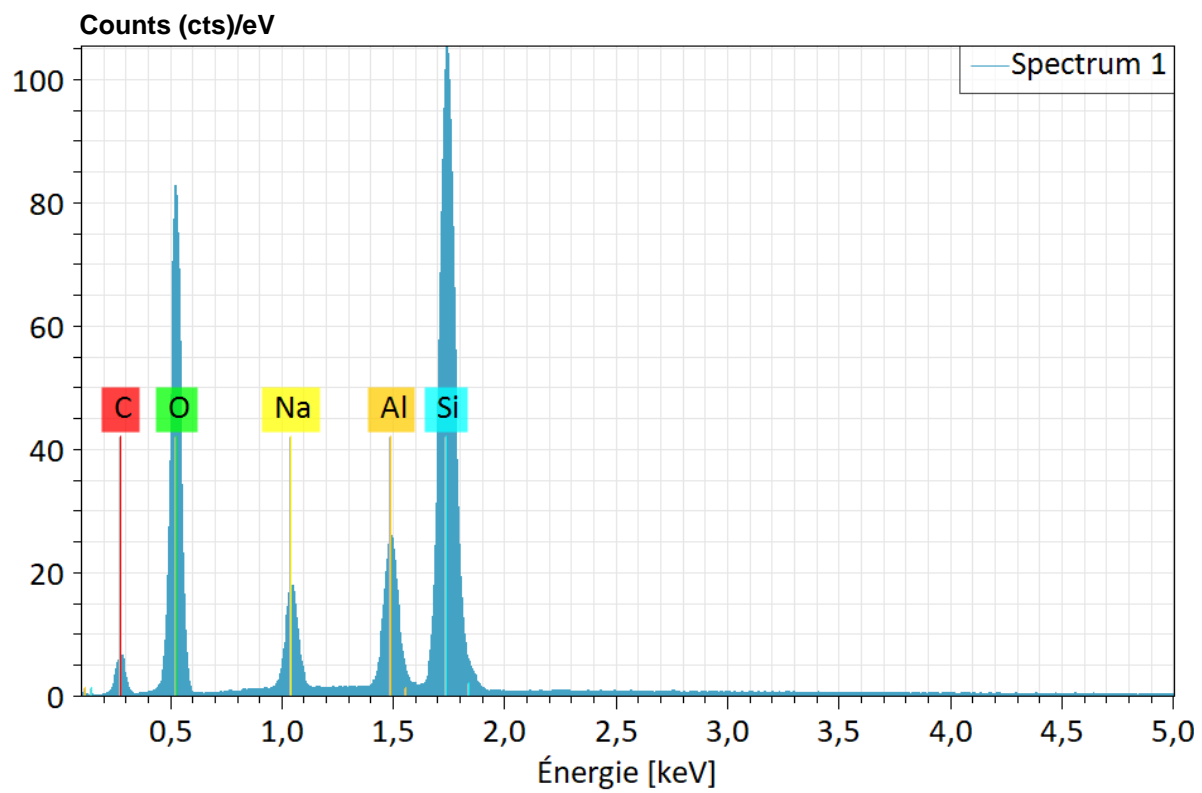

**Figure S3:** Projections along [100] of the ECR-1 zeolite. In (a), the structure obtained earlier by Gualtieri et al. (Ref. [11] in the text) through a Rietveld refinement from PXRD data is shown, where Na<sup>+</sup> cations are labeled as C1 to C4. In (b), the resulting structure after the dynamical refinement of 3D ED data collected during the current study is presented.

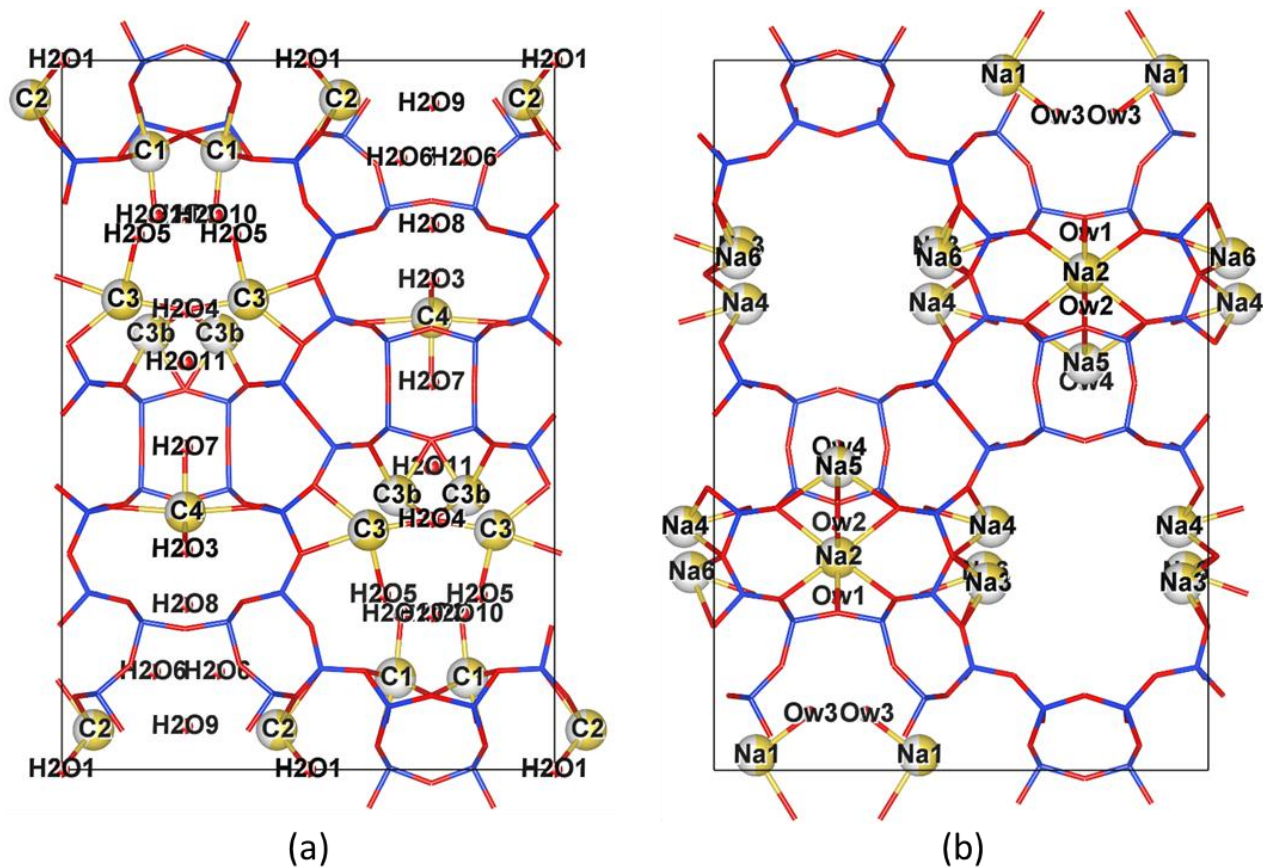

**Table S1:** Fractional atomic coordinates and isotropic displacement parameters ( $\text{\AA}^2$ ) of ECR-1(3D ED, kinematical refinement).

| Atom | Wyck. | Site | s.o.f. | x/a        | y/b        | z/c        | U [ $\text{\AA}^2$ ] |
|------|-------|------|--------|------------|------------|------------|----------------------|
| Si1  | 8g    | 1    |        | 0.0459(14) | 0.0529(8)  | 0.1390(4)  | 0.0470               |
| Si2  | 8g    | 1    |        | 0.5453(13) | 0.5549(8)  | 0.0451(4)  | 0.0400               |
| Si3  | 4e    | m..  |        | 1/4        | 0.0713(13) | 0.3989(7)  | 0.0620               |
| Si4  | 8g    | 1    |        | 0.5440(13) | 0.0578(8)  | 0.2512(4)  | 0.0440               |
| Si5  | 4e    | m..  |        | 1/4        | 0.6585(13) | 0.8956(5)  | 0.0560               |
| Si6  | 8g    | 1    |        | 0.0472(14) | 0.0263(9)  | 0.6467(4)  | 0.0510               |
| Si7  | 4e    | m..  |        | 1/4        | 0.6612(13) | 0.0201(5)  | 0.0440               |
| Si8  | 8g    | 1    |        | 0.0437(13) | 0.6646(8)  | 0.4120(4)  | 0.0490               |
| Si9  | 4e    | m..  |        | 1/4        | 0.1630(14) | 0.2913(7)  | 0.0680               |
| Si10 | 4e    | m..  |        | 1/4        | 0.1553(13) | 0.5044(7)  | 0.0630               |
| O1   | 8g    | 1    |        | 0.514(3)   | 0.5214(18) | 0.1015(8)  | 0.0980               |
| O2   | 8g    | 1    |        | 0.066(3)   | 0.1285(16) | 0.2595(8)  | 0.0870               |
| O3   | 8g    | 1    |        | 0.076(3)   | 0.628(2)   | 0.0434(9)  | 0.1130               |
| O4   | 4e    | m..  |        | 1/4        | 0.111(2)   | 0.4536(13) | 0.0920               |
| O5   | 4e    | m..  |        | 1/4        | 0.079(2)   | 0.9581(10) | 0.0770               |
| O6   | 4e    | m..  |        | 1/4        | 0.073(2)   | 0.1301(9)  | 0.0690               |
| O7   | 4e    | m..  |        | 1/4        | 0.576(2)   | 0.7488(9)  | 0.0620               |
| O8   | 2b    | mm2  |        | 1/4        | 3/4        | 0.0339(16) | 0.0880               |
| O9   | 2a    | mm2  |        | 1/4        | 1/4        | 0.2849(16) | 0.0870               |
| O10  | 8g    | 1    |        | 0.066(3)   | 0.1432(15) | 0.5391(7)  | 0.0740               |
| O11  | 8g    | 1    |        | 0.004(2)   | 0.0128(14) | 0.7053(7)  | 0.0570               |
| O12  | 2a    | mm2  |        | 1/4        | 1/4        | 0.4908(17) | 0.1040               |
| O13  | 2b    | mm2  |        | 1/4        | 3/4        | 0.8790(16) | 0.0930               |
| O14  | 8g    | 1    |        | 0.017(2)   | 0.0332(15) | 0.1954(7)  | 0.0740               |
| O15  | 8g    | 1    |        | 0.075(3)   | 0.0254(17) | 0.3921(7)  | 0.0860               |
| O16  | 8g    | 1    |        | 0.559(3)   | 0.122(2)   | 0.1309(9)  | 0.1000               |
| O17  | 4f    | .m.  |        | 0.505(3)   | 1/4        | 0.6008(9)  | 0.0700               |
| O18  | 4e    | m..  |        | 1/4        | 0.648(3)   | 0.9558(13) | 0.1100               |
| O19  | 8g    | 1    |        | 0.001(2)   | 0.6094(16) | 0.3613(7)  | 0.0690               |
| O20  | 4e    | m..  |        | 1/4        | 0.141(3)   | 0.3526(13) | 0.1110               |
| O21  | 4e    | m..  |        | 1/4        | 0.007(2)   | 0.6303(9)  | 0.0630               |
| O22  | 4e    | m..  |        | 1/4        | 0.657(2)   | 0.4296(10) | 0.0750               |
| O23  | 4c    | -1   |        | 0          | 0          | 0          | 0.1900               |
| Na1  | 4e    | m..  | 0.4    | 1/4        | 0.573(8)   | 0.521(4)   | 0.1600               |
| Na2  | 4f    | .m.  | 0.46   | 0.537(10)  | 1/4        | 0.211(3)   | 0.1600               |
| Na3  | 4e    | m..  | 0.23   | 1/4        | 0.596(15)  | 0.233(7)   | 0.1600               |
| Na4  | 2b    | mm2  | 0.27   | 1/4        | 3/4        | 0.738(8)   | 0.1600               |
| Na5  | 2a    | mm2  | 0.53   | 1/4        | 1/4        | 0.159(4)   | 0.1600               |
| Na6  | 2a    | mm2  | 0.39   | 1/4        | 1/4        | 0.059(5)   | 0.1600               |
| Na7  | 4f    | .m.  | 0.2    | 0.70(3)    | 1/4        | 0.420(6)   | 0.1600               |
| Na8  | 4e    | m..  | 0.33   | 1/4        | 0.080(9)   | 0.820(4)   | 0.1600               |

**Table S2:** Fractional atomic coordinates and isotropic displacement parameters ( $\text{\AA}^2$ ) of ECR-1 (3D ED, dynamical refinement).

| Atom | Wyck. | Site | s.o.f.    | x/a        | y/b        | z/c         | U [ $\text{\AA}^2$ ] |
|------|-------|------|-----------|------------|------------|-------------|----------------------|
| Si1  | 8g    | 1    |           | 0.5476(6)  | 0.4488(5)  | 0.36172(17) | 0.0334(17)           |
| Si2  | 8g    | 1    |           | 0.4520(6)  | 0.5545(4)  | 0.45250(15) | 0.0218(14)           |
| Si3  | 4e    | m..  |           | 3/4        | 0.4270(7)  | 0.1018(3)   | 0.046(3)             |
| Si4  | 8g    | 1    |           | 0.4528(6)  | 0.4422(5)  | 0.24804(16) | 0.0241(15)           |
| Si5  | 4e    | m..  |           | 1/4        | 0.3366(7)  | 0.3955(2)   | 0.025(3)             |
| Si6  | 8g    | 1    |           | 0.4550(7)  | 0.5228(5)  | 0.14502(17) | 0.0301(17)           |
| Si7  | 4e    | m..  |           | 1/4        | 0.3344(7)  | 0.5186(2)   | 0.039(3)             |
| Si8  | 8g    | 1    |           | 0.5429(6)  | 0.6665(6)  | 0.08679(16) | 0.0337(18)           |
| Si9  | 4e    | m..  |           | 3/4        | 0.3398(7)  | 0.2102(3)   | 0.043(3)             |
| Si10 | 4e    | m..  |           | 3/4        | 0.3396(5)  | -0.0060(2)  | 0.044(3)             |
| O1   | 8g    | 1    |           | 0.4865(11) | 0.5137(8)  | 0.3979(3)   | 0.0702(9)            |
| O2   | 8g    | 1    |           | 0.5667(14) | 0.3664(6)  | 0.2405(3)   | 0.0702               |
| O3   | 8g    | 1    |           | 0.0668(11) | 0.3731(6)  | 0.5385(4)   | 0.0702               |
| O4   | 4e    | m..  |           | 3/4        | 0.3853(10) | 0.0471(4)   | 0.0702               |
| O5   | 4e    | m..  |           | 1/4        | 0.5738(15) | 0.4587(5)   | 0.0702               |
| O6   | 4e    | m..  |           | 3/4        | 0.4285(14) | 0.3694(5)   | 0.0702               |
| O7   | 4e    | m..  |           | 1/4        | 0.4195(16) | 0.2478(5)   | 0.0702               |
| O8   | 2a    | mm2  |           | 1/4        | 1/4        | 0.5363(8)   | 0.0702               |
| O9   | 2b    | mm2  |           | 3/4        | 1/4        | 0.2218(9)   | 0.0702               |
| O10  | 8g    | 1    |           | 0.4254(12) | 0.6394(10) | 0.0350(3)   | 0.0702               |
| O11  | 8g    | 1    |           | 0.5023(11) | 0.5013(7)  | 0.2025(3)   | 0.0702               |
| O12  | 2b    | mm2  |           | 3/4        | 1/4        | 0.0119(8)   | 0.0702               |
| O13  | 2a    | mm2  |           | 1/4        | 1/4        | 0.3758(8)   | 0.0702               |
| O14  | 8g    | 1    |           | 0.5095(11) | 0.4822(10) | 0.3013(4)   | 0.0702               |
| O15  | 8g    | 1    |           | 0.5631(13) | 0.4701(10) | 0.1051(3)   | 0.0702               |
| O16  | 8g    | 1    |           | 0.4373(14) | 0.3727(7)  | 0.3692(4)   | 0.0702               |
| O17  | 4f    | .m.  |           | 0.5021(18) | 3/4        | 0.1054(6)   | 0.0702               |
| O18  | 4e    | m..  |           | 1/4        | 0.3508(14) | 0.4549(5)   | 0.0702               |
| O19  | 8g    | 1    |           | 0.5063(14) | 0.6067(13) | 0.1334(4)   | 0.0702               |
| O20  | 4e    | m..  |           | 3/4        | 0.3630(14) | 0.1475(5)   | 0.0702               |
| O21  | 4e    | m..  |           | 1/4        | 0.5069(15) | 0.1301(4)   | 0.0702               |
| O22  | 4e    | m..  |           | 3/4        | 0.6645(15) | 0.0695(5)   | 0.0702               |
| O23  | 4d    | -1   |           | 1/2        | 1/2        | 1/2         | 0.0702               |
| Na1  | 4e    | m..  | 0.507(13) | 1/4        | 0.415(3)   | 0.0209(9)   | 0.1200 <sup>a</sup>  |
| Na2  | 4f    | .m.  | 0.789(15) | 0.492(2)   | 1/4        | 0.3001(7)   | 0.1200 <sup>a</sup>  |
| Na3  | 4e    | m..  | 0.212(14) | 3/4        | 0.553(6)   | 0.263(2)    | 0.1200 <sup>a</sup>  |
| Na4  | 4e    | m..  | 0.209(15) | 3/4        | 0.561(3)   | 0.343(3)    | 0.1200 <sup>a</sup>  |
| Na5  | 4f    | .m.  | 0.082(19) | 0.93(2)    | 1/4        | 0.427(4)    | 0.1200 <sup>a</sup>  |
| Na6  | 4e    | m..  | 0.240(15) | 1/4        | 0.547(3)   | 0.279(2)    | 0.1200 <sup>a</sup>  |
| Ow1  | 2a    | mm2  | 0.71(3)   | 1/4        | 1/4        | 0.2439(13)  | 0.1300 <sup>a</sup>  |
| Ow2  | 2b    | mm2  | 0.70(3)   | 3/4        | 1/4        | 0.3477(13)  | 0.1300 <sup>a</sup>  |
| Ow3  | 8g    | 1    | 0.159(12) | 0.313(9)   | 0.307(4)   | 0.079(2)    | 0.1300 <sup>a</sup>  |
| Ow4  | 2b    | mm2  | 0.36(4)   | 3/4        | 1/4        | 0.454(3)    | 0.1300 <sup>a</sup>  |

<sup>a</sup> These ADPs have been fixed to a reasonable values during the refinement.

**Table S3:** Si—O bond lengths and O—Si—O angles of ECR-1 (3D ED, dynamical refinement).

|     |     |             |     |             |              |
|-----|-----|-------------|-----|-------------|--------------|
| Si1 | O1  | 1.5531(139) | O6  | 1.5704(77)  | 112.410(805) |
|     | O1  | 1.5531(139) | O16 | 1.6010(144) | 114.146(796) |
|     | O1  | 1.5531(139) | O14 | 1.6850(126) | 103.656(548) |
|     | O6  | 1.5704(77)  | O16 | 1.6010(144) | 106.675(801) |
|     | O6  | 1.5704(77)  | O14 | 1.6850(126) | 111.122(821) |
|     | O16 | 1.6010(144) | O14 | 1.6850(126) | 108.846(672) |
| Si2 | O5  | 1.5591(76)  | O3  | 1.5689(119) | 109.536(792) |
|     | O5  | 1.5591(76)  | O1  | 1.5997(106) | 110.273(800) |
|     | O5  | 1.5591(76)  | O23 | 1.6000(53)  | 105.928(702) |
|     | O3  | 1.5689(119) | O1  | 1.5997(106) | 114.537(626) |
|     | O3  | 1.5689(119) | O23 | 1.6000(53)  | 105.397(472) |
|     | O1  | 1.5997(106) | O23 | 1.6000(53)  | 110.728(491) |
| Si3 | O4  | 1.5884(153) | O15 | 1.5989(135) | 105.792(789) |
|     | O4  | 1.5884(153) | O15 | 1.5989(135) | 105.792(789) |
|     | O4  | 1.5884(153) | O20 | 1.6368(222) | 107.811(862) |
|     | O15 | 1.5989(135) | O15 | 1.5989(135) | 122.112(829) |
|     | O15 | 1.5989(135) | O20 | 1.6368(222) | 107.323(871) |
|     | O15 | 1.5989(135) | O20 | 1.6368(222) | 107.323(871) |
| Si4 | O7  | 1.5714(88)  | O14 | 1.5990(132) | 112.021(886) |
|     | O7  | 1.5714(88)  | O2  | 1.6107(132) | 107.128(827) |
|     | O7  | 1.5714(88)  | O11 | 1.617(12)   | 112.753(832) |
|     | O14 | 1.5990(132) | O2  | 1.6107(132) | 109.695(660) |
|     | O14 | 1.5990(132) | O11 | 1.617(12)   | 105.389(539) |
|     | O2  | 1.6107(132) | O11 | 1.617(12)   | 109.859(662) |
| Si5 | O18 | 1.5448(144) | O13 | 1.6260(136) | 117.550(877) |
|     | O18 | 1.5448(144) | O16 | 1.6842(120) | 109.417(843) |
|     | O18 | 1.5448(144) | O16 | 1.6842(120) | 109.417(843) |
|     | O13 | 1.6260(136) | O16 | 1.6842(120) | 103.831(706) |
|     | O13 | 1.6260(136) | O16 | 1.6842(120) | 103.831(706) |
|     | O16 | 1.6842(120) | O16 | 1.6842(120) | 112.728(694) |
| Si6 | O11 | 1.5643(94)  | O19 | 1.5743(239) | 110.890(666) |
|     | O11 | 1.5643(94)  | O21 | 1.6070(75)  | 113.416(793) |
|     | O11 | 1.5643(94)  | O15 | 1.6088(141) | 110.048(486) |
|     | O19 | 1.5743(239) | O21 | 1.6070(75)  | 110.844(910) |
|     | O19 | 1.5743(239) | O15 | 1.6088(141) | 108.225(938) |
|     | O21 | 1.6070(75)  | O15 | 1.6088(141) | 103.036(824) |
| Si7 | O8  | 1.5732(134) | O3  | 1.6182(105) | 108.516(716) |
|     | O8  | 1.5732(134) | O3  | 1.6182(105) | 108.516(716) |
|     | O8  | 1.5732(134) | O18 | 1.6602(145) | 116.93(85)   |
|     | O3  | 1.6182(105) | O3  | 1.6182(105) | 115.890(678) |
|     | O3  | 1.6182(105) | O18 | 1.6602(145) | 103.609(785) |
|     | O3  | 1.6182(105) | O18 | 1.6602(145) | 103.609(785) |
| Si8 | O17 | 1.5943(114) | O22 | 1.6131(57)  | 106.689(847) |
|     | O17 | 1.5943(114) | O19 | 1.6260(187) | 111.159(816) |



|      |     |             |     |             |              |
|------|-----|-------------|-----|-------------|--------------|
|      | O17 | 1.5943(114) | O10 | 1.6652(106) | 114.153(733) |
|      | O22 | 1.6131(57)  | O19 | 1.6260(187) | 110.468(924) |
|      | O22 | 1.6131(57)  | O10 | 1.6652(106) | 106.375(843) |
|      | O19 | 1.6260(187) | O10 | 1.6652(106) | 107.885(526) |
| Si9  | O9  | 1.6300(131) | O2  | 1.6470(112) | 101.374(738) |
|      | O9  | 1.6300(131) | O2  | 1.6470(112) | 101.374(738) |
|      | O9  | 1.6300(131) | O20 | 1.6610(161) | 114.954(883) |
|      | O2  | 1.6470(112) | O2  | 1.6470(112) | 112.853(686) |
|      | O2  | 1.6470(112) | O20 | 1.6610(161) | 112.657(816) |
|      | O2  | 1.6470(112) | O20 | 1.6610(161) | 112.657(816) |
| Si10 | O10 | 1.5551(100) | O10 | 1.5551(100) | 115.218(743) |
|      | O10 | 1.5551(100) | O4  | 1.5877(142) | 106.659(716) |
|      | O10 | 1.5551(100) | O12 | 1.6637(104) | 111.327(705) |
|      | O10 | 1.5551(100) | O4  | 1.5877(142) | 106.659(716) |
|      | O10 | 1.5551(100) | O12 | 1.6637(104) | 111.327(705) |
|      | O4  | 1.5877(142) | O12 | 1.6637(104) | 104.886(679) |

---
